# Supplementary material
Source: PubMed Central journal article supplement (PMC4142076)
Supplement: NIHMS592505-supplement-supplement_1.pdf [file NIHMS592505-supplement-supplement_1.pdf]

## Supporting Information

for *Small*, DOI: 10.1002/smll.201303629

### **Facile Method for the Site-Specific, Covalent Attachment of full-length IgG onto Nanoparticles**

*James Zhe Hui, Ajlan Al Zaki, Zhiliang Cheng, Vladimir Popik, Hongtao Zhang, Eline T.*

*Luning Prak, and Andrew Tsourkas,\**

#### **SUPPLEMENTARY METHODS:**

##### **Protein Z Sequence**

The amino acid sequence of the photoreactive protein Z is provided below. The amino acids that were mutated to BPA are shown in red.

VDNK**F**NKEQQNA**F**YEILHLPNLNEEQRNAFIQSLKDDPSQSANLLAEAKKLNDAQAP  
KMRM

**SUPPLEMENTARY FIGURES:**

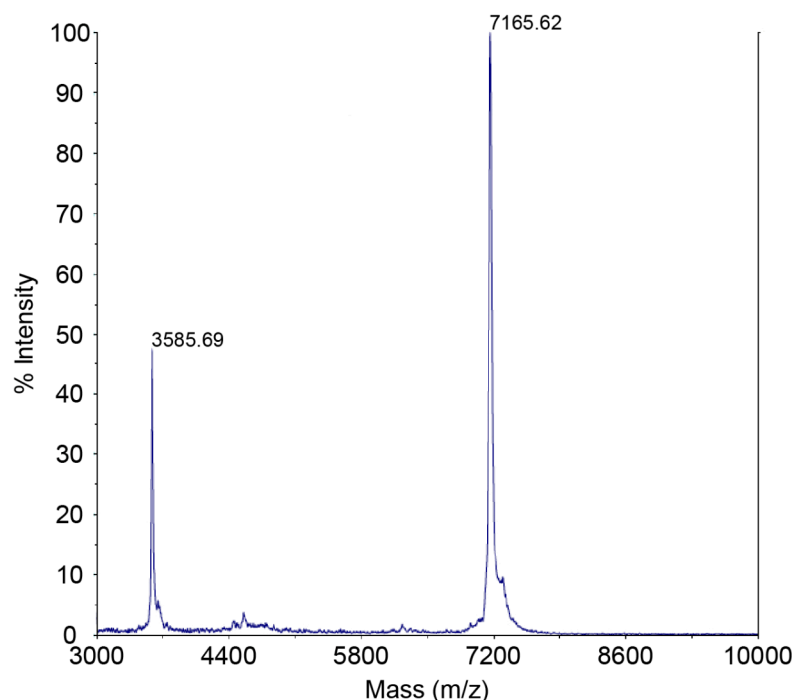

**Figure S1. MALDI-MS spectrum of F13BPA variant of Protein Z.** The F13BPA variant of Protein Z was expressed, cleaved on-column with dithiothreitol (DTT) and purified with RP-HPLC. The resulting product was analyzed by MALDI-MS. The detected mass (7165.62 Da) is in close agreement with the theoretical mass of 7163.26 Da, confirming the identity of Protein Z with a single BPA substitution in place of phenylalanine.

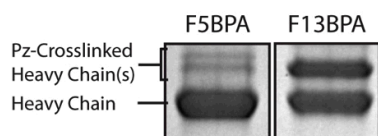

**Figure S2. Comparison of IgG crosslinking using F5BPA and F13BPA variants of Protein Z.** Rituximab was incubated with the F5BPA or F13BPA variants of Protein Z and exposed to UV irradiation. Protein Z-IgG conjugates were evaluated via a reducing SDS-PAGE gel.

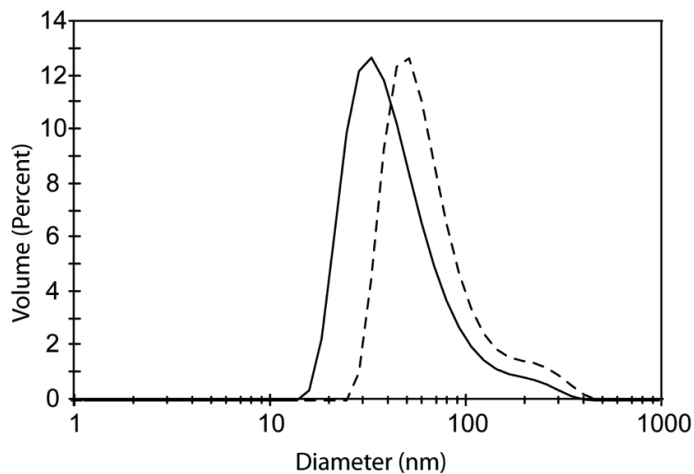

**Figure S3.** Dynamic light scattering measurements of SPIO. The volume-weighted hydrodynamic diameter of unlabeled SPIO (solid) and SPIO-rituximab conjugates (dashed) were measured by dynamic light scattering. The measuring angle was  $90^\circ$ .

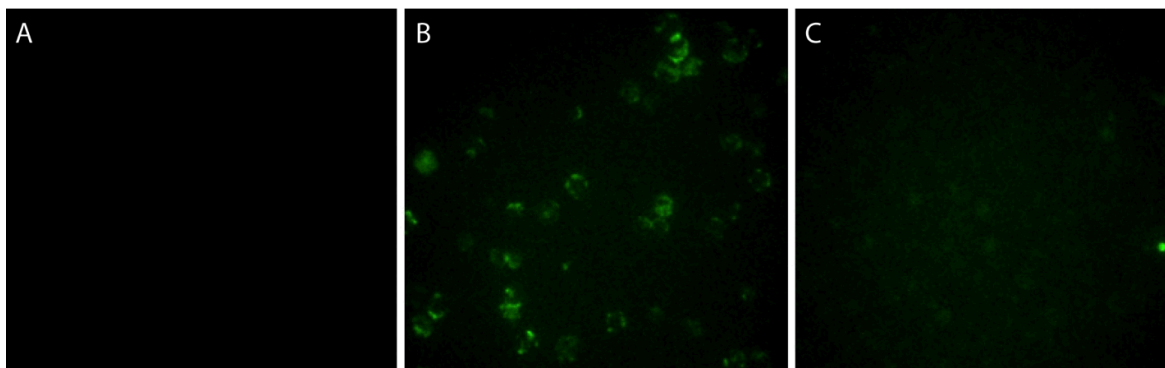

**Figure S4.** Fluorescent microscopy images of B cells. Fluorescent images of GA-10 B cells that were incubated with (A) unlabeled SPIO, (B) SPIO-rituximab conjugates, or (C) SPIO-rituximab conjugates in the presence of excess free rituximab.
